# Supplementary material
Source: MDPI journal article supplement (https://www.mdpi.com/2673-3897/1/3/17)
Supplement: s1 [file s1]

## Supplementary Materials.

### Figure S1: Needs Assessment Survey

**For the purpose of this survey, a didactic education curriculum is defined as scheduled learning sessions +/- associated readings.**

\* 1. In which U.S. region is your program?

- |                                 |                                 |
|---------------------------------|---------------------------------|
| <input type="radio"/> Northeast | <input type="radio"/> Southwest |
| <input type="radio"/> Southeast | <input type="radio"/> West      |
| <input type="radio"/> Midwest   |                                 |

\* 2. Which best describes your program setting?

- ☐ Urban
- ☐ Suburban
- ☐ Rural

\* 3. Which best describes your residency program?

- ☐ University-based
- ☐ Community-based/University-affiliated
- ☐ Community-based

\* 4. How many residents per year do you have in your program?

- ☐ 1-2
- ☐ 3-4
- ☐ 5-6
- ☐ 7 or greater

\* 5. What is your role in your residency program?

- ☐ Program Director
- ☐ Assistant/Associate Program Director
- ☐ PGY1
- ☐ PGY2
- ☐ PGY3
- ☐ PGY4

\* 6. Does your residency program currently have a didactic education curriculum (scheduled learning sessions +/- associated readings)?

- ☐ Yes
- ☐ No
- ☐ Not sure

\* 7. Please answer the following questions about Ob/Gyn educational resources (select all that apply):

|                                                                                                  | ACOG<br>Practice<br>Bulletins | ACOG<br>Committee<br>Opinions | Ob/Gyn<br>Textbooks      | PROLOG                   | Question<br>banks (Ex.<br>TruLearn) | CoreCases<br>for Ob-Gyn  | Excellence<br>Learning<br>Modules | Faculty<br>generated<br>materials<br>(Ex. PPTs) | N/A                      |
|--------------------------------------------------------------------------------------------------|-------------------------------|-------------------------------|--------------------------|--------------------------|-------------------------------------|--------------------------|-----------------------------------|-------------------------------------------------|--------------------------|
| Which educational resources does your program use as part of your didactic education curriculum? | <input type="checkbox"/>      | <input type="checkbox"/>      | <input type="checkbox"/> | <input type="checkbox"/> | <input type="checkbox"/>            | <input type="checkbox"/> | <input type="checkbox"/>          | <input type="checkbox"/>                        | <input type="checkbox"/> |
| Which educational resources do you use for your own independent learning?                        | <input type="checkbox"/>      | <input type="checkbox"/>      | <input type="checkbox"/> | <input type="checkbox"/> | <input type="checkbox"/>            | <input type="checkbox"/> | <input type="checkbox"/>          | <input type="checkbox"/>                        | <input type="checkbox"/> |
| Which educational resources do you find to be the most useful for the CREOG In-Training Exam?    | <input type="checkbox"/>      | <input type="checkbox"/>      | <input type="checkbox"/> | <input type="checkbox"/> | <input type="checkbox"/>            | <input type="checkbox"/> | <input type="checkbox"/>          | <input type="checkbox"/>                        | <input type="checkbox"/> |

\* 8. How often does your residency didactic education curriculum cycle?

- |                               |                                      |
|-------------------------------|--------------------------------------|
| <input type="radio"/> 1 year  | <input type="radio"/> Does not cycle |
| <input type="radio"/> 2 years | <input type="radio"/> Not sure       |
| <input type="radio"/> 3 years | <input type="radio"/> N/A            |
| <input type="radio"/> 4 years |                                      |

\* 9. What are your current struggles with your residency didactic education curriculum? (select all that apply)

- |                                                           |                                                                                    |
|-----------------------------------------------------------|------------------------------------------------------------------------------------|
| <input type="checkbox"/> Too much structure               | <input type="checkbox"/> Low resident participation                                |
| <input type="checkbox"/> Not enough structure             | <input type="checkbox"/> Education time not fully protected                        |
| <input type="checkbox"/> Too much didactic time           | <input type="checkbox"/> Not enough resident input in curriculum structure/content |
| <input type="checkbox"/> Not enough didactic time         | <input type="checkbox"/> Too much resident input in curriculum structure/content   |
| <input type="checkbox"/> Changes too often                | <input type="checkbox"/> Cost of resources                                         |
| <input type="checkbox"/> Not updated often enough         | <input type="checkbox"/> None                                                      |
| <input type="checkbox"/> Too time consuming for residents | <input type="checkbox"/> N/A                                                       |
| <input type="checkbox"/> Too time consuming to maintain   |                                                                                    |
| <input type="checkbox"/> Other (please specify)           |                                                                                    |

\* 10. How satisfied are you with the didactic education curriculum at your residency program?

| Very unsatisfied      | Unsatisfied           | Neutral               | Satisfied             | Very satisfied        | N/A                   |
|-----------------------|-----------------------|-----------------------|-----------------------|-----------------------|-----------------------|
| <input type="radio"/> |

11. Please indicate the extent to which you agree or disagree with the following questions about Ob/Gyn residency education:

|                                                                                                                                          | Strongly disagree     | Disagree              | Neither agree nor disagree | Agree                 | Strongly agree        | N/A                   |
|------------------------------------------------------------------------------------------------------------------------------------------|-----------------------|-----------------------|----------------------------|-----------------------|-----------------------|-----------------------|
| The didactic education curriculum at my residency program could be improved.                                                             | <input type="radio"/> | <input type="radio"/> | <input type="radio"/>      | <input type="radio"/> | <input type="radio"/> | <input type="radio"/> |
| All Ob/Gyn residents across the country should learn the same content through their didactic education curriculum.                       | <input type="radio"/> | <input type="radio"/> | <input type="radio"/>      | <input type="radio"/> | <input type="radio"/> | <input type="radio"/> |
| It is important for residents nationwide to have equal access to high quality Ob/Gyn education resources during their training.          | <input type="radio"/> | <input type="radio"/> | <input type="radio"/>      | <input type="radio"/> | <input type="radio"/> | <input type="radio"/> |
| I would like to have existing core Ob/Gyn educational resources (such as those developed by ACOG and CREOG) in one centralized location. | <input type="radio"/> | <input type="radio"/> | <input type="radio"/>      | <input type="radio"/> | <input type="radio"/> | <input type="radio"/> |
| I would like to have a curriculum of core education topics for Ob/Gyn residency that is developed and implemented on a national level.   | <input type="radio"/> | <input type="radio"/> | <input type="radio"/>      | <input type="radio"/> | <input type="radio"/> | <input type="radio"/> |
| There is a need for a national Ob/Gyn residency education curriculum.                                                                    | <input type="radio"/> | <input type="radio"/> | <input type="radio"/>      | <input type="radio"/> | <input type="radio"/> | <input type="radio"/> |
| A national Ob/Gyn residency education curriculum would improve resident performance on the CREOG In-Training Exam.                       | <input type="radio"/> | <input type="radio"/> | <input type="radio"/>      | <input type="radio"/> | <input type="radio"/> | <input type="radio"/> |

\* 12. If a national Ob/Gyn residency education curriculum were to be developed, I would like it to include the following:

|                                                | Strongly disagree     | Disagree              | Neither agree or disagree | Agree                 | Strongly agree        |
|------------------------------------------------|-----------------------|-----------------------|---------------------------|-----------------------|-----------------------|
| Core learning topics                           | <input type="radio"/> | <input type="radio"/> | <input type="radio"/>     | <input type="radio"/> | <input type="radio"/> |
| Learning objectives for each topic             | <input type="radio"/> | <input type="radio"/> | <input type="radio"/>     | <input type="radio"/> | <input type="radio"/> |
| Core readings associated with each topic       | <input type="radio"/> | <input type="radio"/> | <input type="radio"/>     | <input type="radio"/> | <input type="radio"/> |
| Additional high yield resources for each topic | <input type="radio"/> | <input type="radio"/> | <input type="radio"/>     | <input type="radio"/> | <input type="radio"/> |
| Quiz questions for each topic                  | <input type="radio"/> | <input type="radio"/> | <input type="radio"/>     | <input type="radio"/> | <input type="radio"/> |
